# Supplementary material for: Voltage and concentration gradients across membraneless interface generated next to hydrogels: relation to glycocalyx
Source: Royal Society of Chemistry journal article supplement (doi:10.1039/d3sm00889d), 2023-01-01
Supplement: d3sm00889d1.pdf [file d3sm00889d1.pdf]

Electronic Supplementary Information

**Voltage and concentration gradient across membraneless interface generated next to hydrogels: relation to glyocalyx**

Magdalena Kowacz,\* Sinith Withanage and Sebastian Niestępski

*Department of Reproductive Immunology & Pathology; Institute of Animal Reproduction and Food Research Polish Academy of Sciences, 10-748 Olsztyn, Poland. E-mail: m.kowacz@pan.olsztyn.pl*

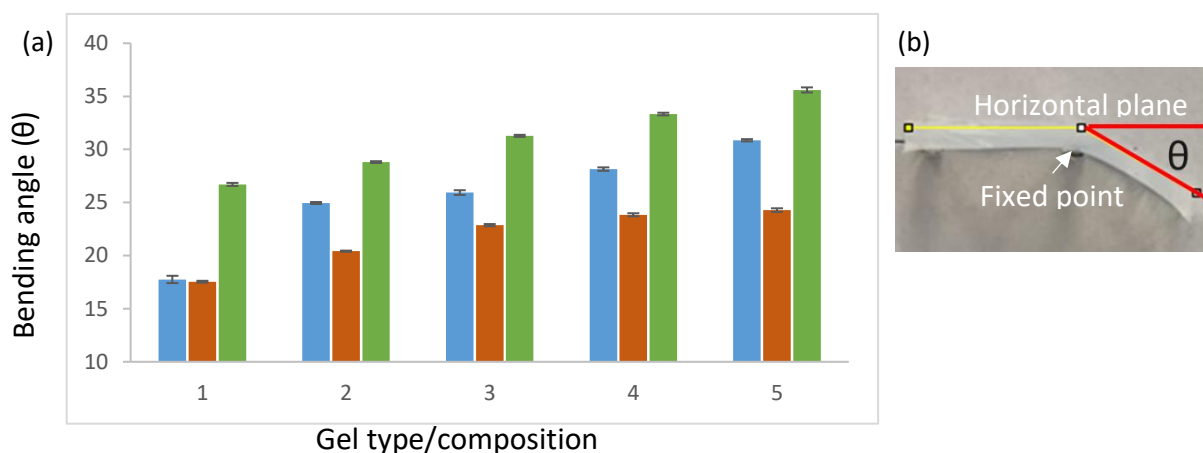

Fig. S1 (a) Bending angle ( $\theta$ ) of: ALG – blue; AG – orange and FU – green. Columns are grouped according to the increasing (from 1 to 5) concentration of functional groups for a given gel type. (b) Image showing a gel specimen bending under a force of gravity after a fixed point to a degree defining  $\theta$ .

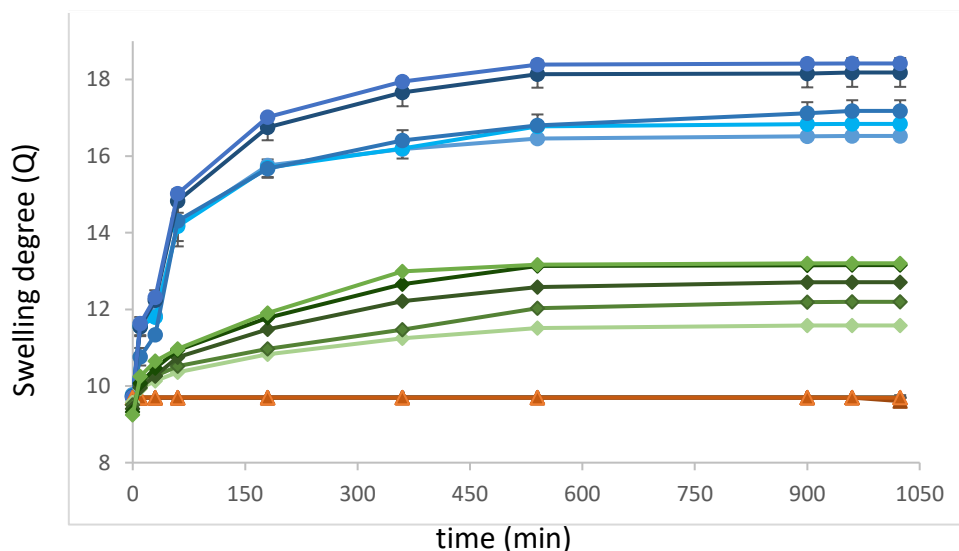

Fig. S2 Swelling degree ( $Q$ ) of: ALG – blue, circles; AG – orange, triangles and FU – green, diamonds. Individual lines for a given gel correspond to different preparations with increasing concentration of functional groups on moving from bottom to top. Thermally crosslinked AG gels are virtually non-swelling due to stiffness of polymer network. ALG swells more with increasing concentration of functional groups in spite of concomitant increase in gel's density and therefore stiffness.
